# Supplementary material for: A TOPBP1 allele causing male infertility uncouples XY silencing dynamics from sex body formation
Source: eLife journal article supplement (doi:10.7554/elife.90887), 2023-09-11

# Replicate #1      Replicate #2

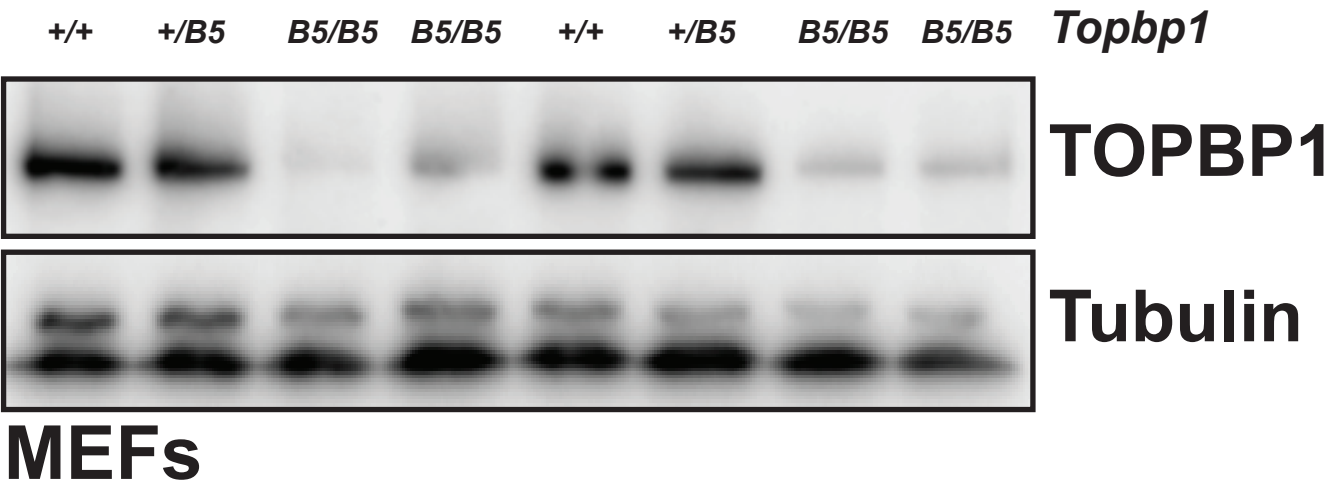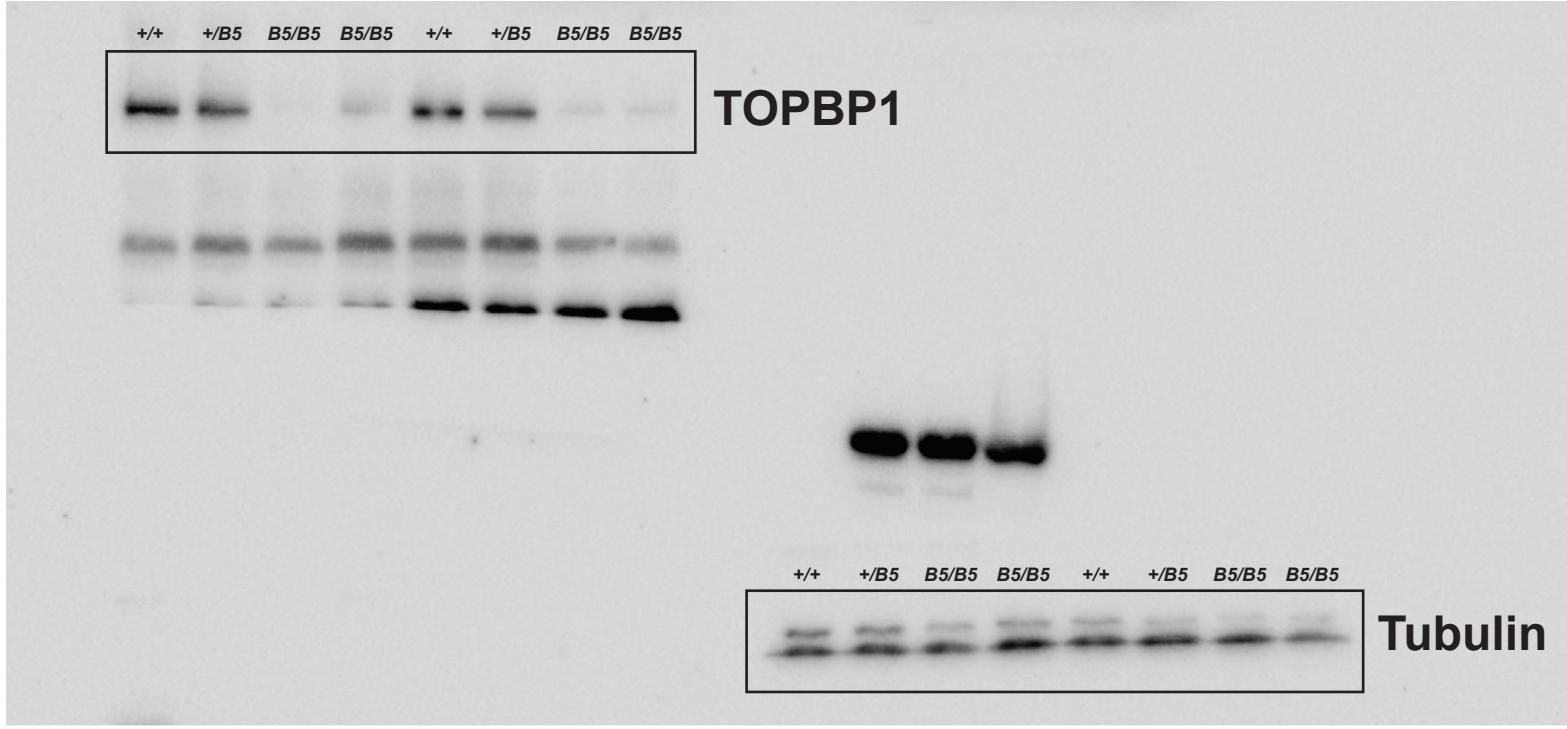

Supplement: fig2-figsupp4-data2 [file elife-90887-fig2-figsupp4-data2-v1.pdf]
