# Supplementary figures and images for: A TOPBP1 allele causing male infertility uncouples XY silencing dynamics from sex body formation
Source: eLife journal article supplement (doi:10.7554/elife.90887), 2023-09-11

Figure 2 Source Data 2

E

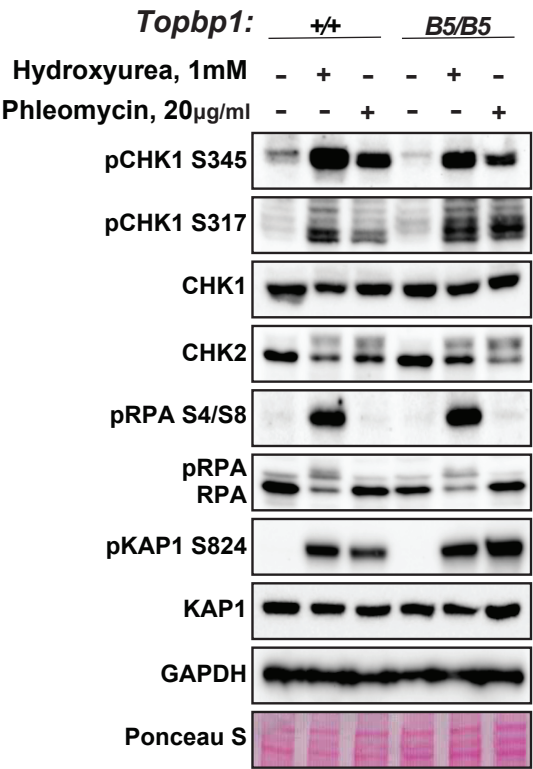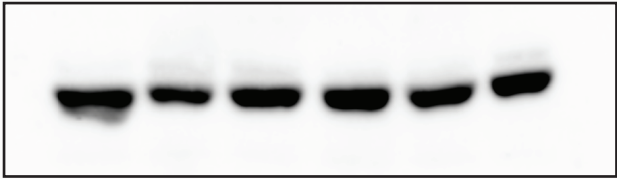

CHK1

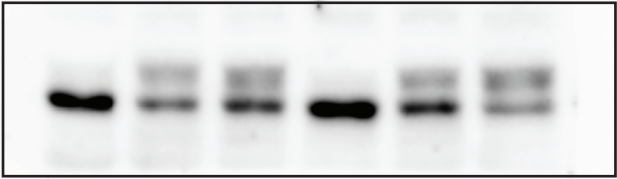

CHK2

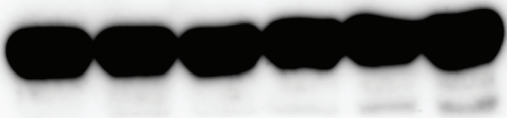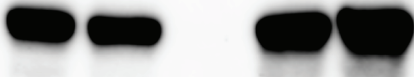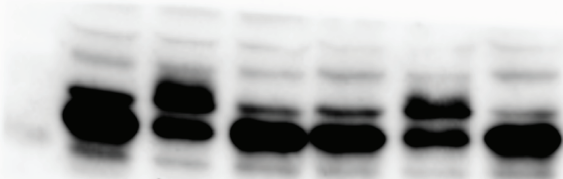

GAPDH

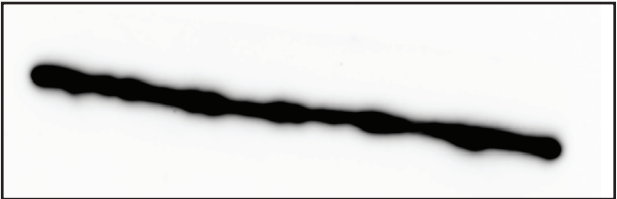

Supplement: fig2-data1 [file elife-90887-fig2-data1-v1.zip]

Figure 2 Source Data 12

E

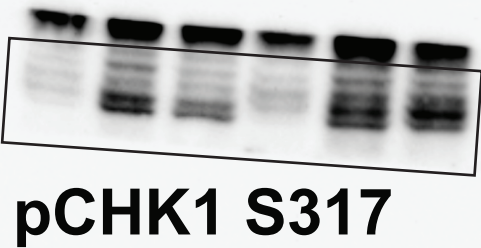

Supplement: fig2-data1 [file elife-90887-fig2-data1-v1.zip]

Figure 2 Source Data 14

E

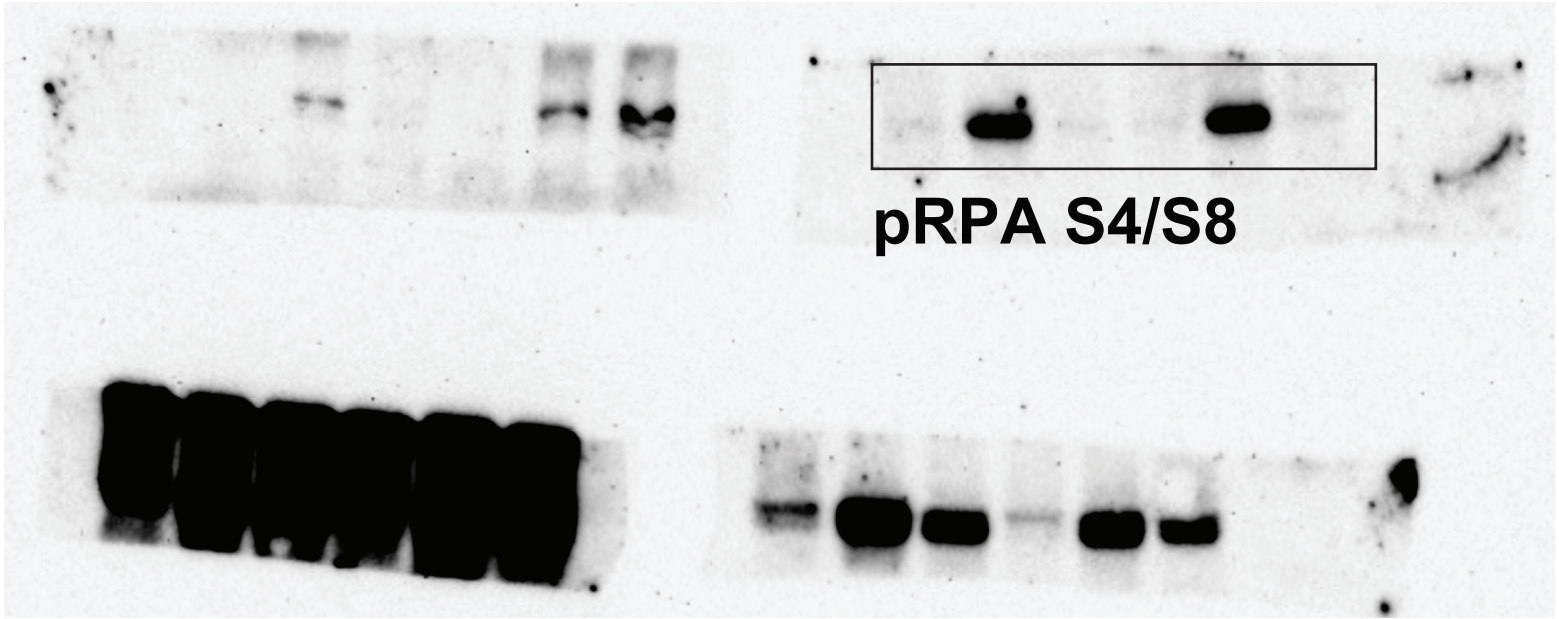

Supplement: fig2-data1 [file elife-90887-fig2-data1-v1.zip]

Figure 2 Source Data 6

E

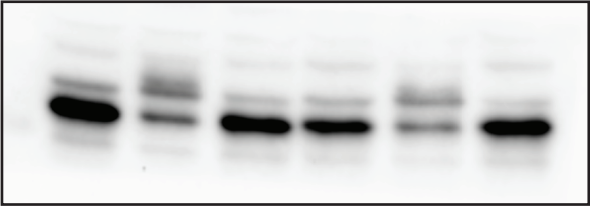

pRPA  
RPA

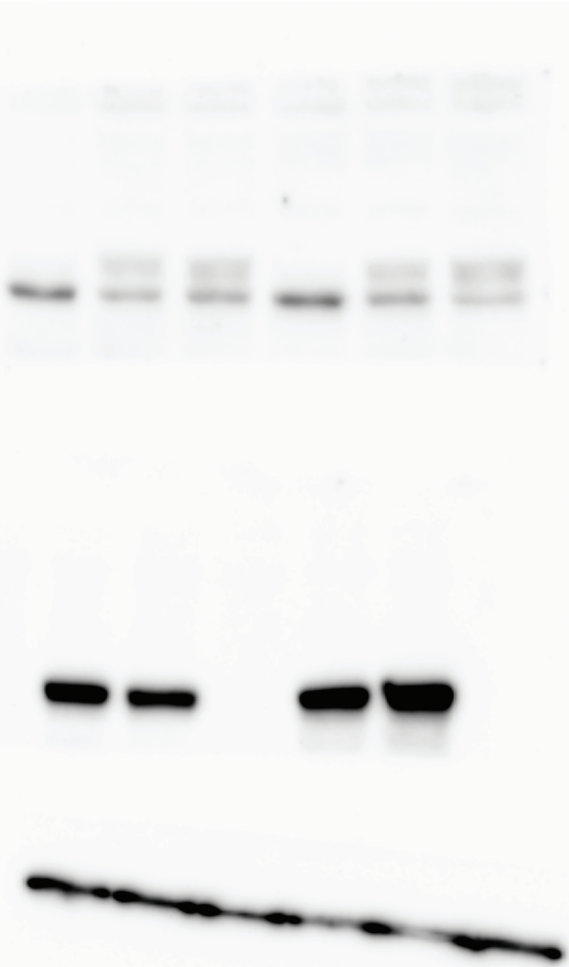

Supplement: fig2-data1 [file elife-90887-fig2-data1-v1.zip]

Figure 2 Source Data 4

E

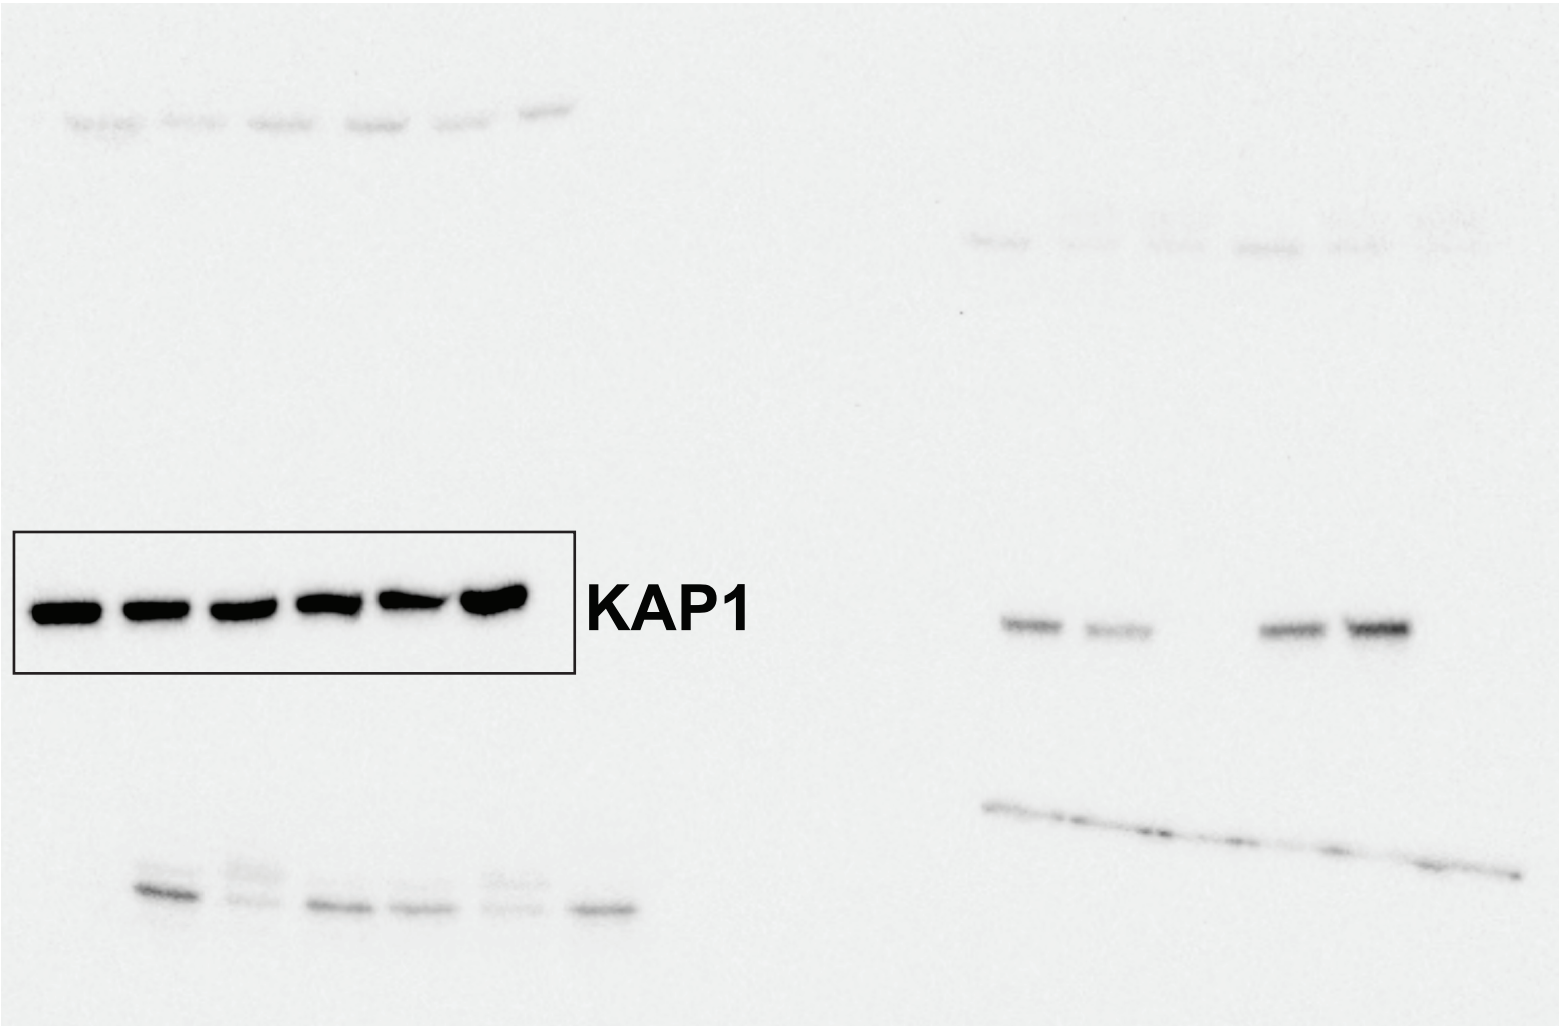

Supplement: fig2-data1 [file elife-90887-fig2-data1-v1.zip]

Figure 2 Source Data 8

E



pKAP1 S824

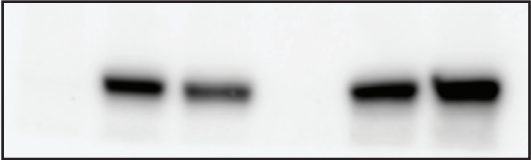

Supplement: fig2-data1 [file elife-90887-fig2-data1-v1.zip]

Figure 2 Source Data 10

E

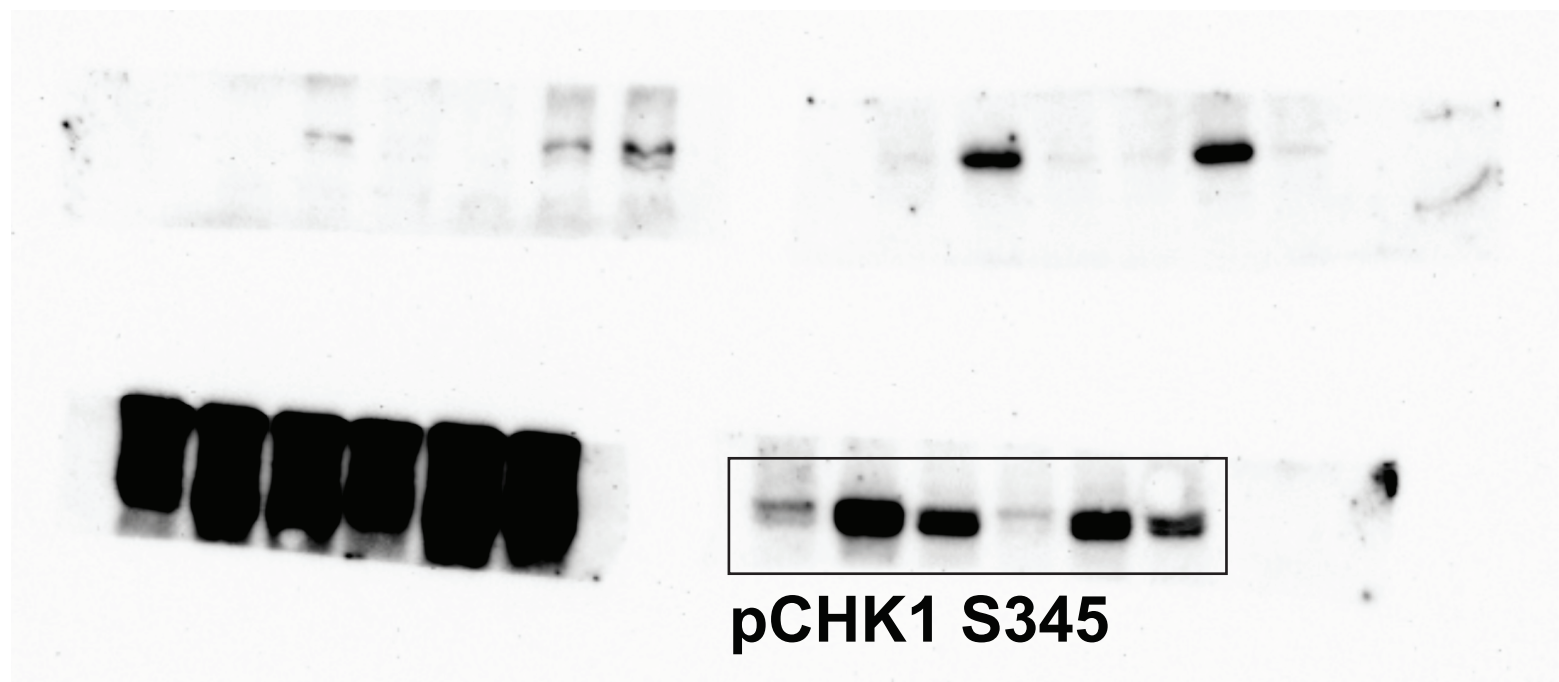

Supplement: fig2-data1 [file elife-90887-fig2-data1-v1.zip]

Figure 2-figure supplement 3\_source\_data\_18

A

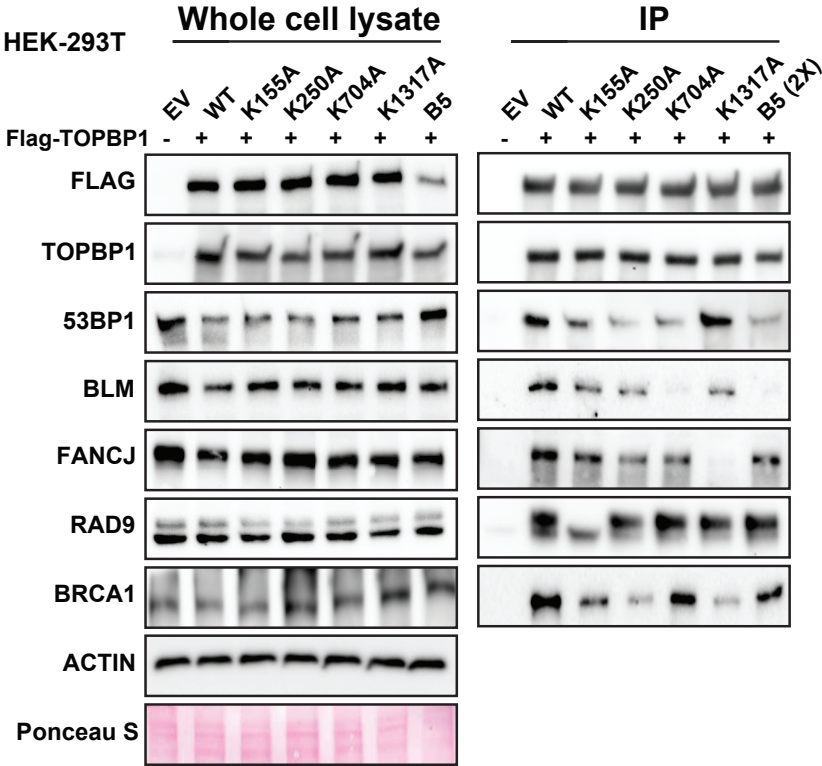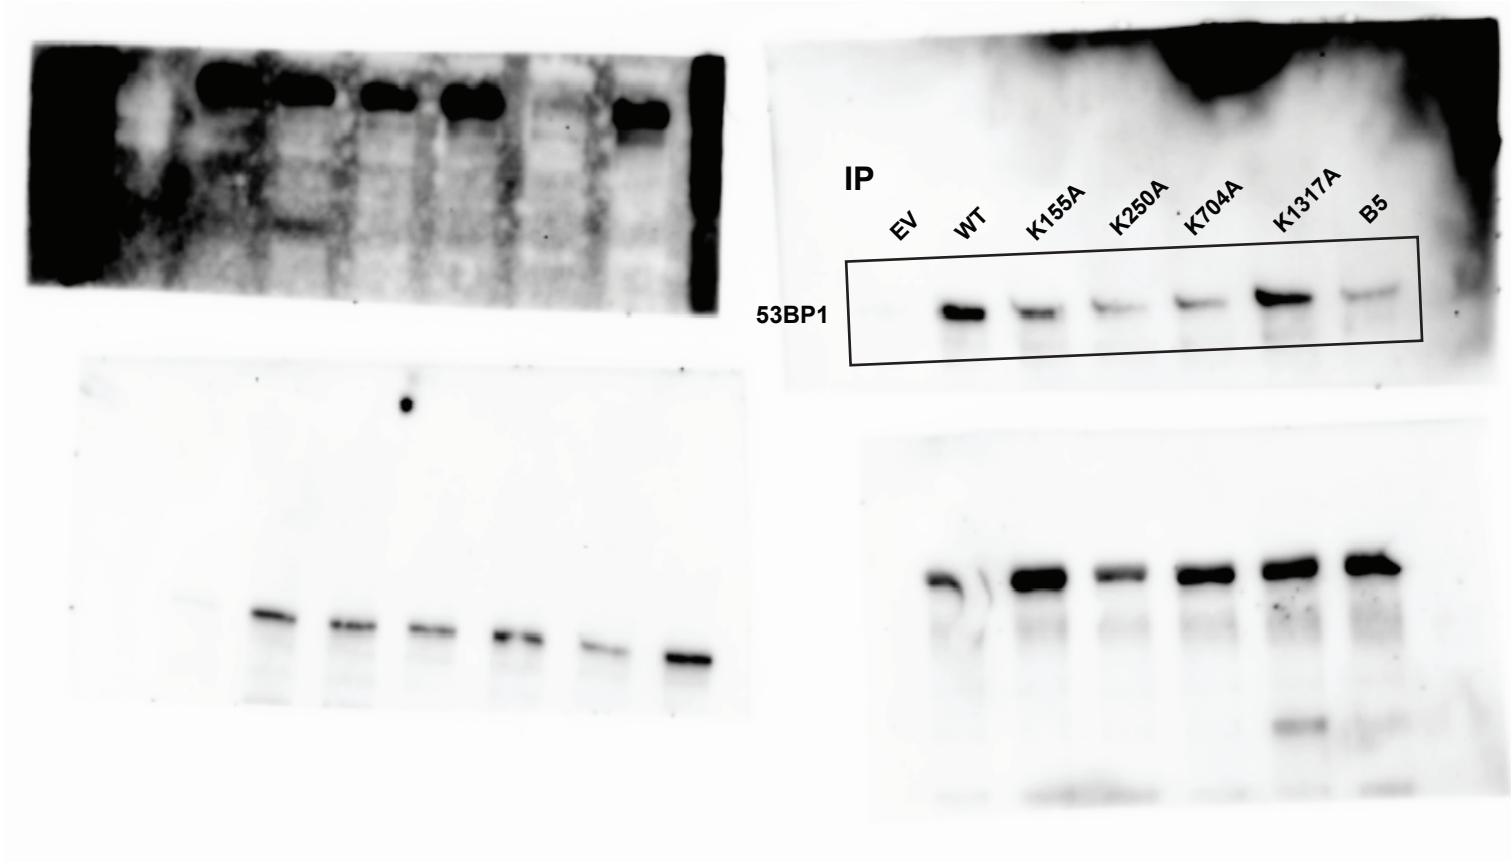

Supplement: fig2-figsupp3-data1 [file elife-90887-fig2-figsupp3-data1-v1.zip]

Figure 2-figure supplement 3\_source\_data\_16

A

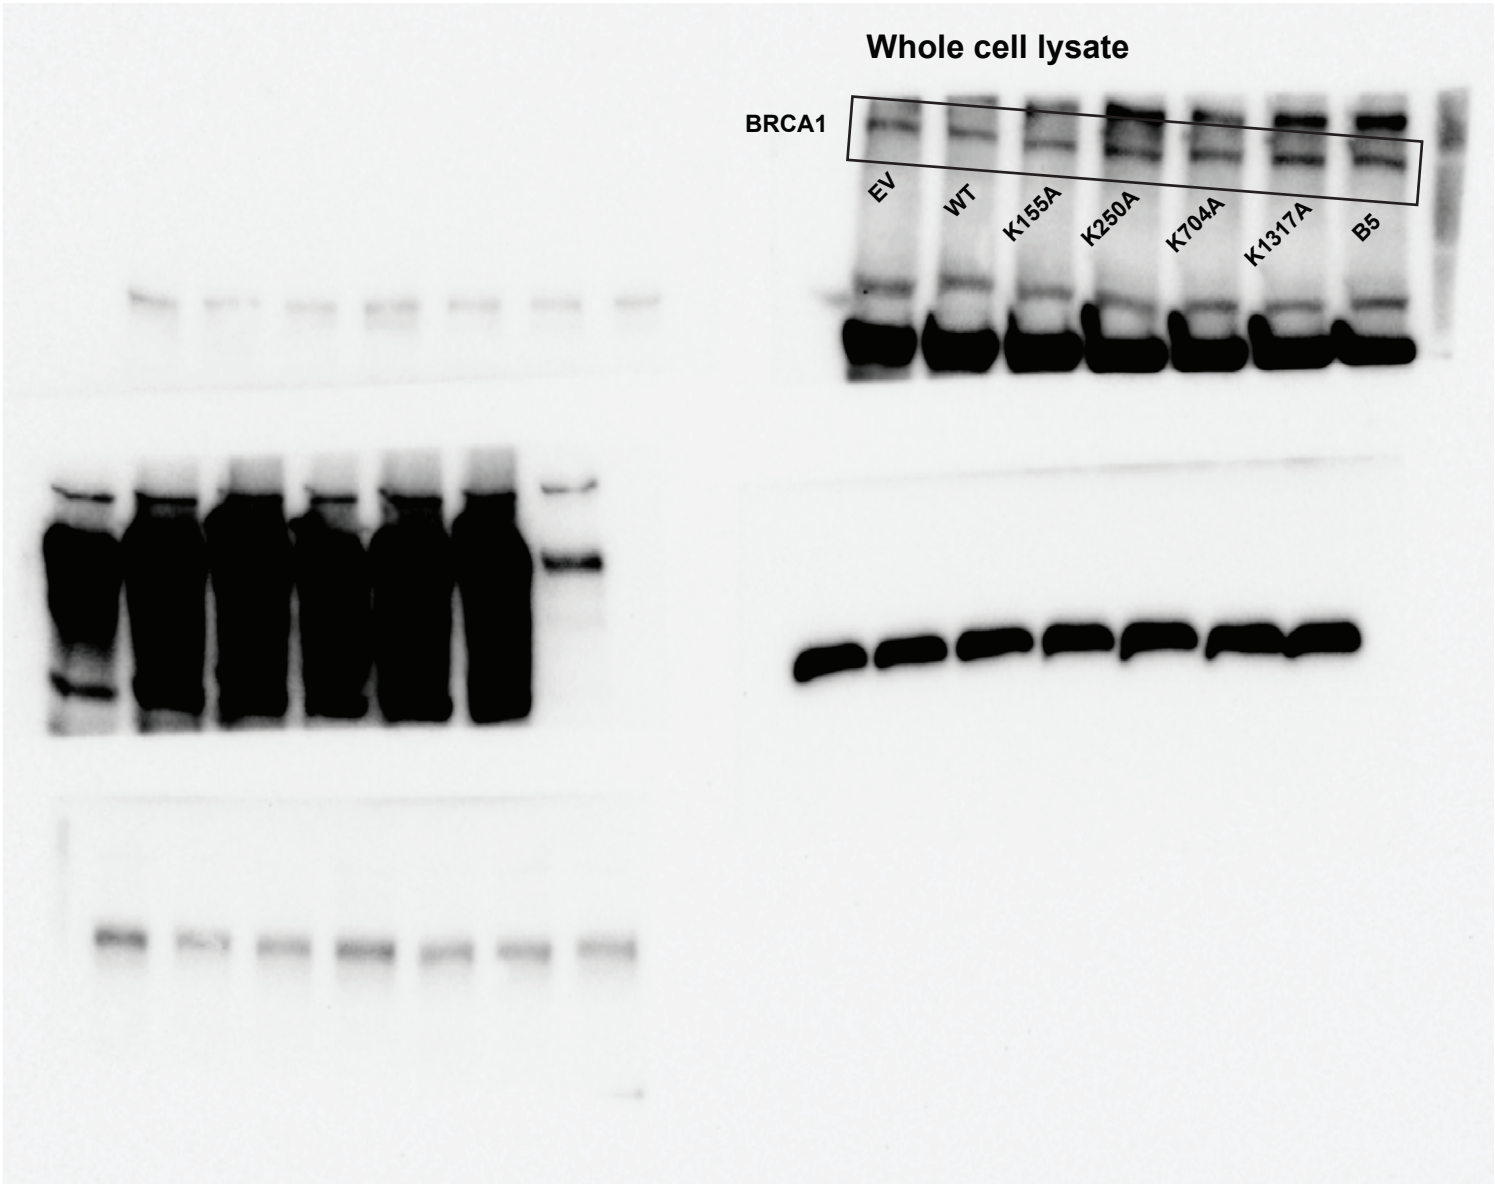

Supplement: fig2-figsupp3-data1 [file elife-90887-fig2-figsupp3-data1-v1.zip]

Figure 2-figure supplement 3\_source\_data\_10

A



Whole cell lysate

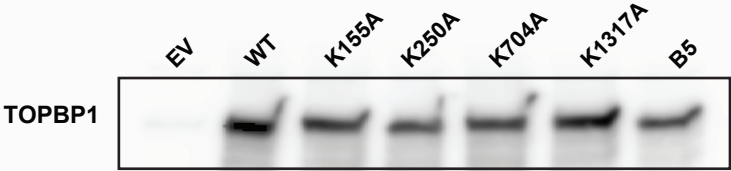

Supplement: fig2-figsupp3-data1 [file elife-90887-fig2-figsupp3-data1-v1.zip]

Figure 2-figure supplement 3\_source\_data\_2

A

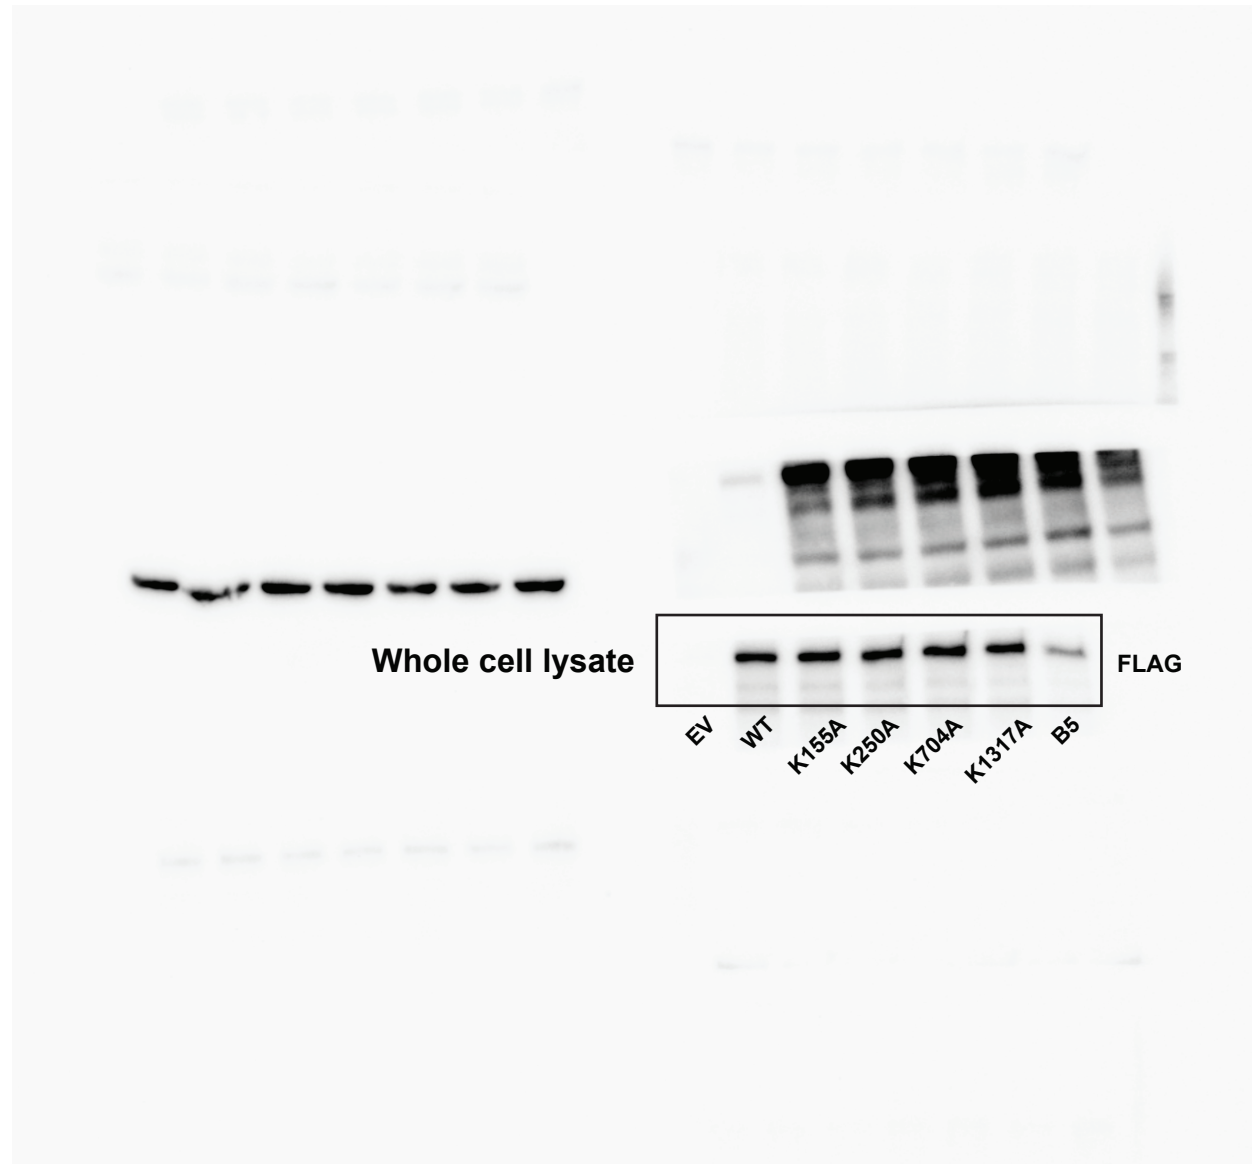

Supplement: fig2-figsupp3-data1 [file elife-90887-fig2-figsupp3-data1-v1.zip]

Figure 2-figure supplement 3\_source\_data\_20

A

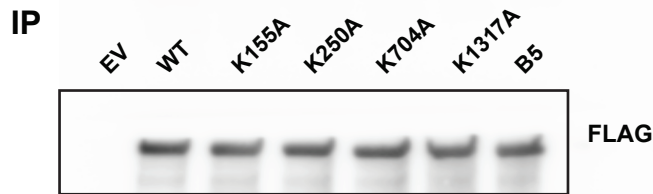

Supplement: fig2-figsupp3-data1 [file elife-90887-fig2-figsupp3-data1-v1.zip]

Figure 2-figure supplement 3\_source\_data\_4

A

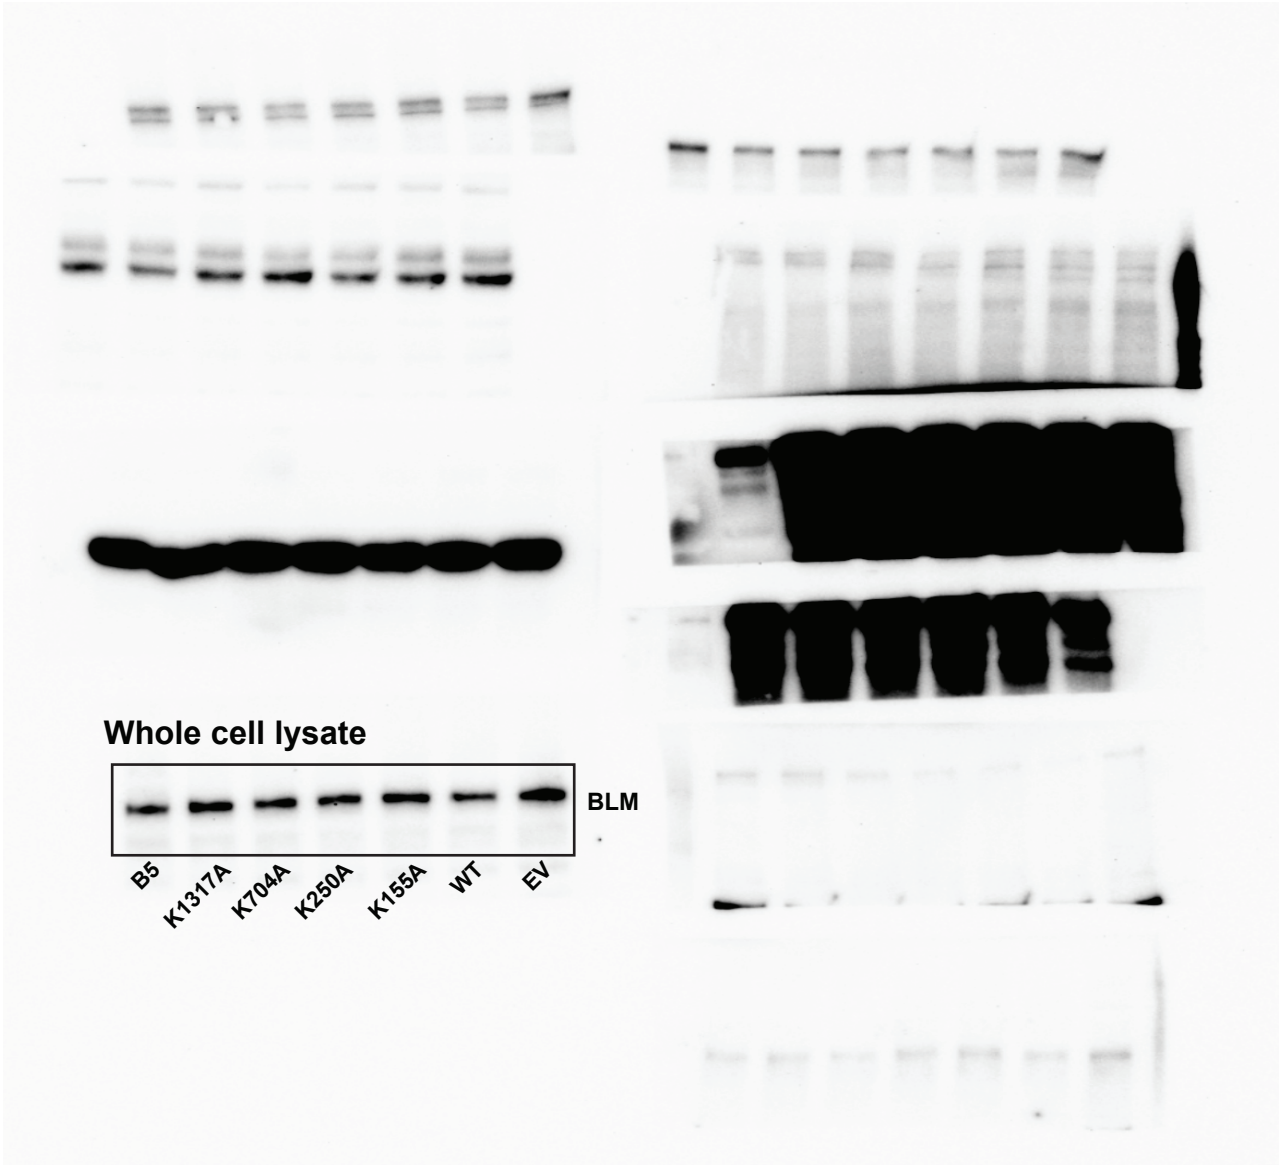

Supplement: fig2-figsupp3-data1 [file elife-90887-fig2-figsupp3-data1-v1.zip]

Figure 2-figure supplement 3\_source\_data\_6

A

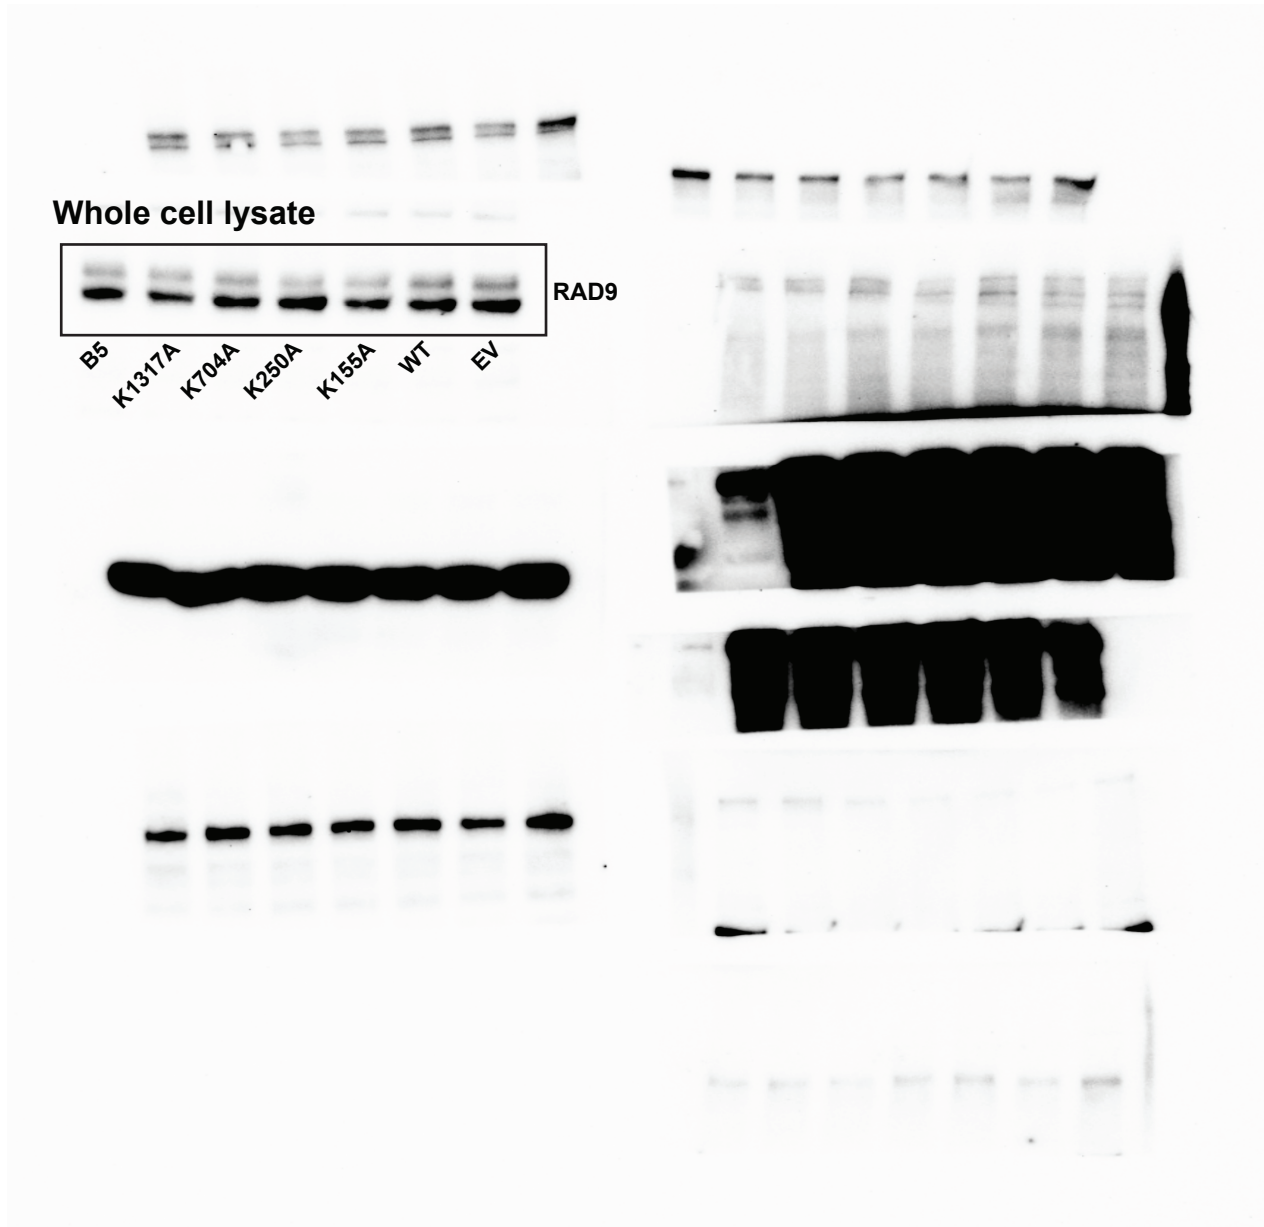

Supplement: fig2-figsupp3-data1 [file elife-90887-fig2-figsupp3-data1-v1.zip]

Figure 2-figure supplement 3\_source\_data\_28

A

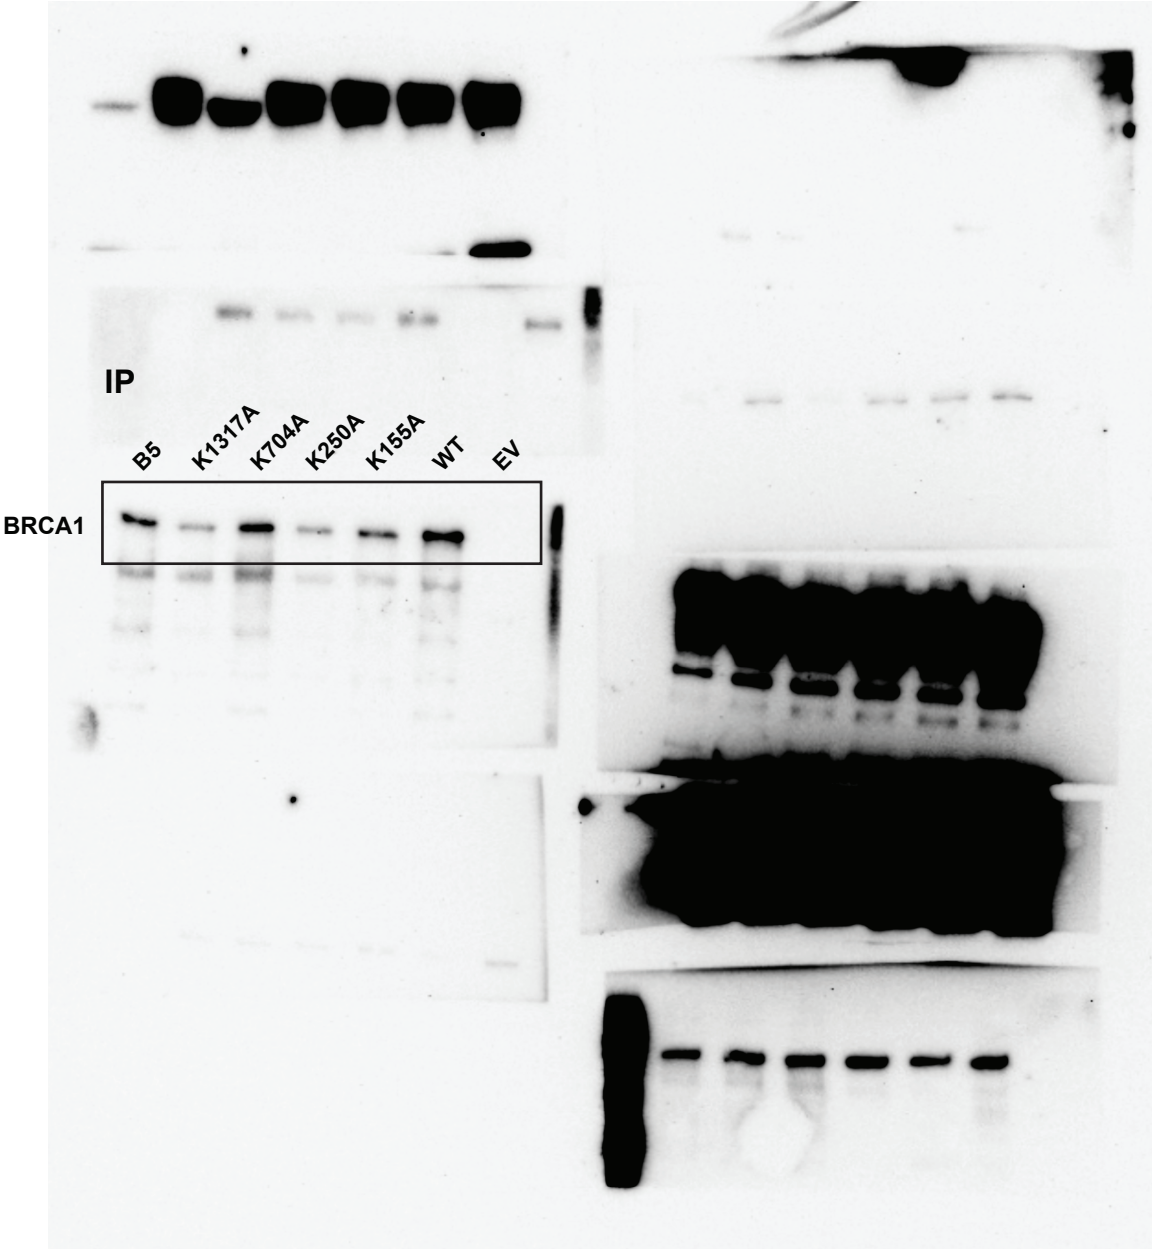

Supplement: fig2-figsupp3-data1 [file elife-90887-fig2-figsupp3-data1-v1.zip]

Figure 2-figure supplement 3\_source\_data\_12

A

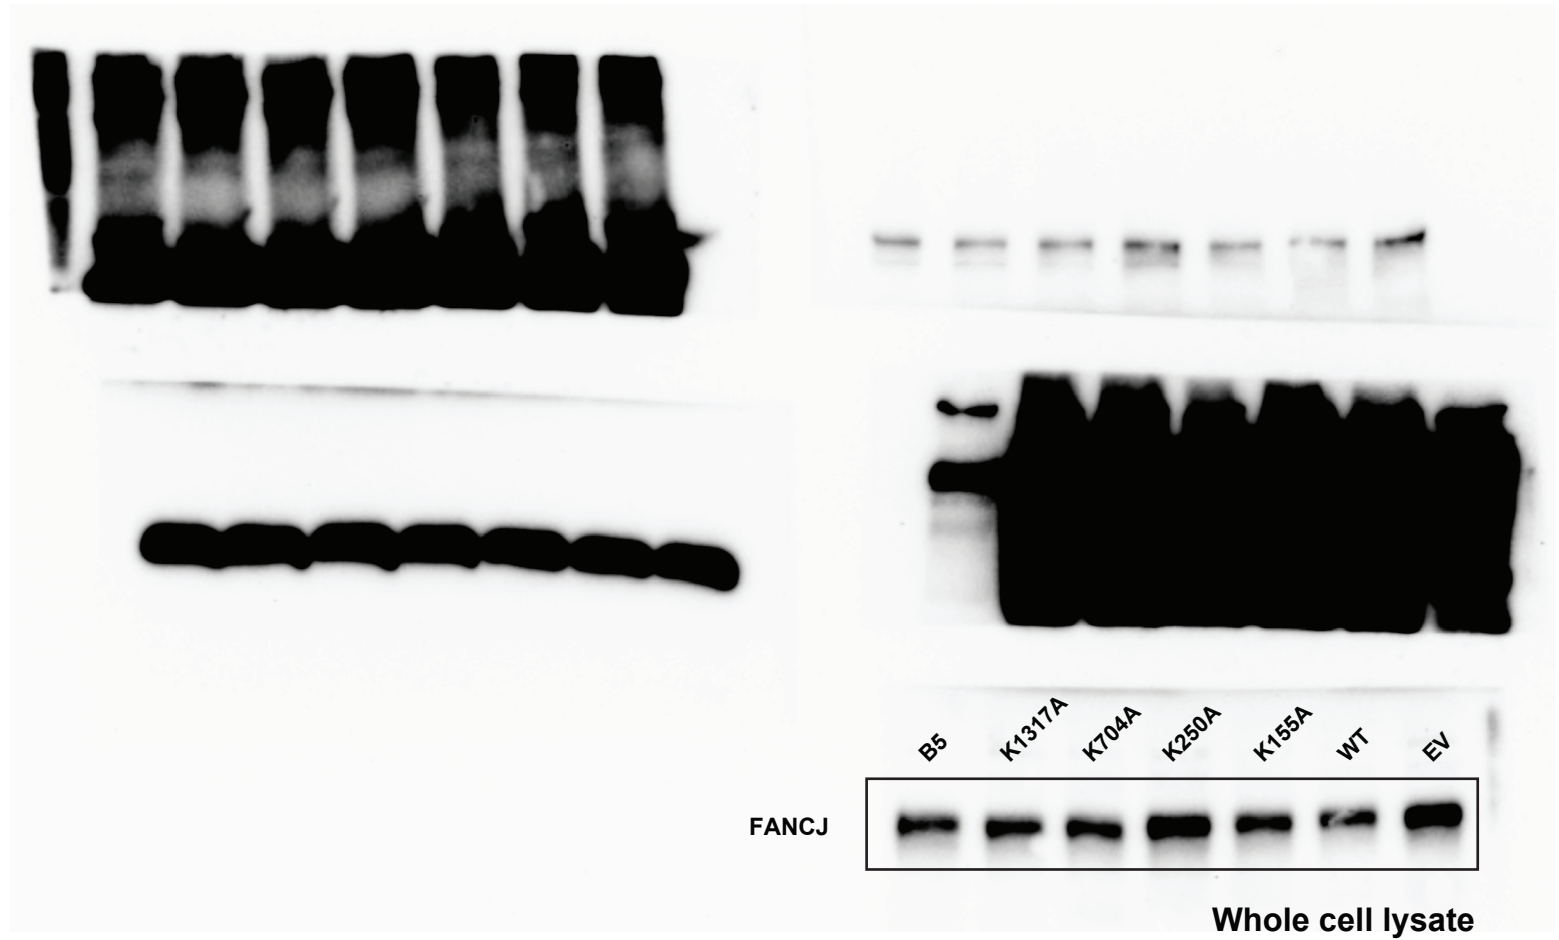

Supplement: fig2-figsupp3-data1 [file elife-90887-fig2-figsupp3-data1-v1.zip]

Figure 2-figure supplement 3\_source\_data\_8

A

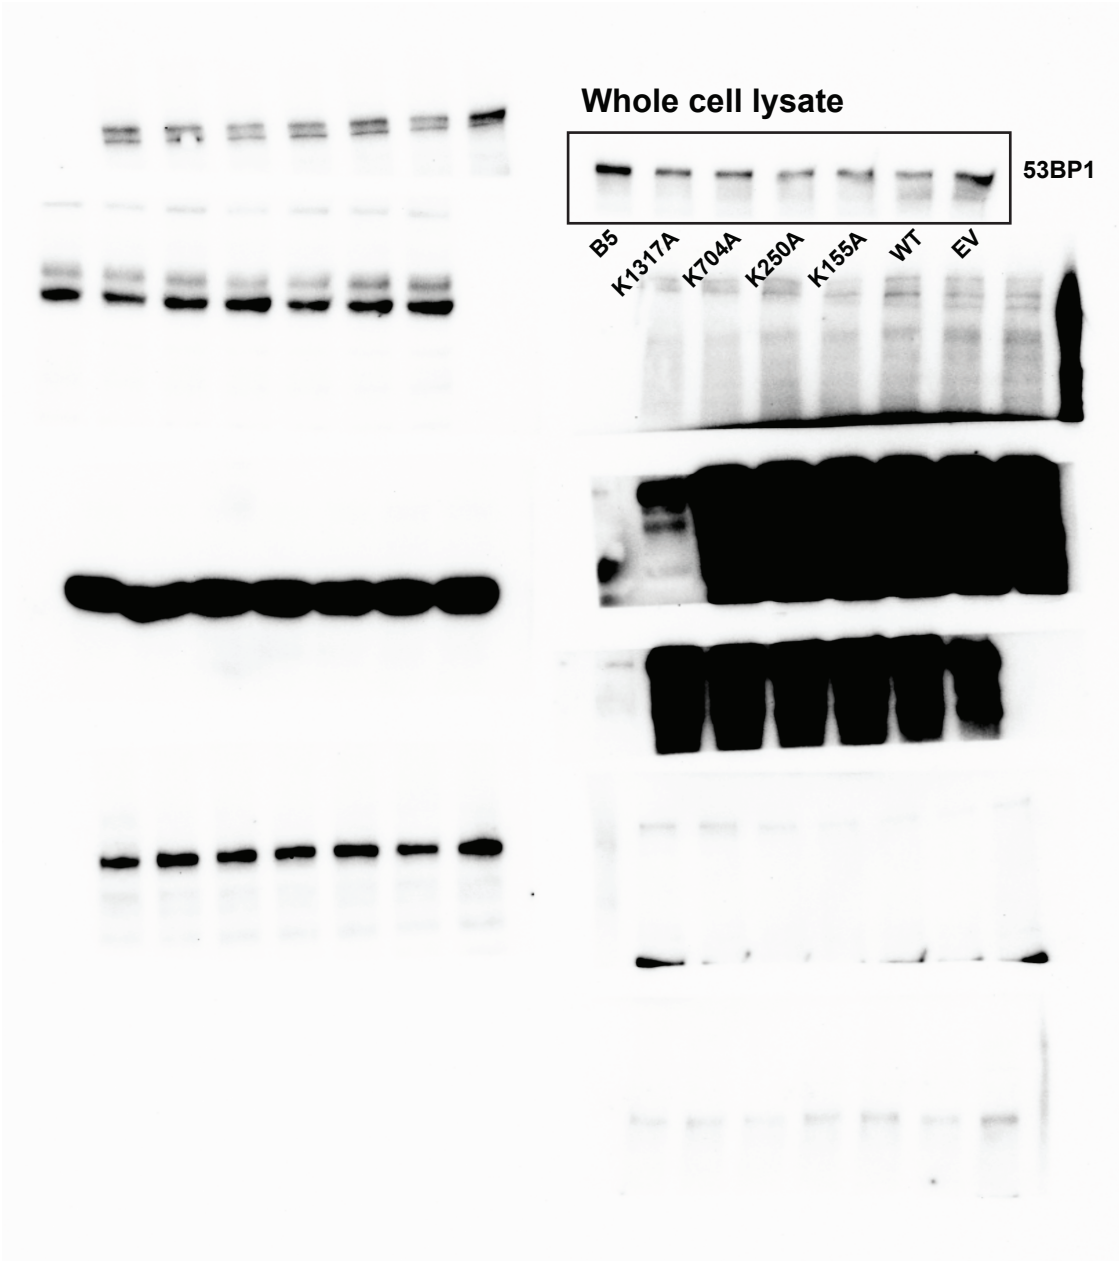

Supplement: fig2-figsupp3-data1 [file elife-90887-fig2-figsupp3-data1-v1.zip]

Figure 2-figure supplement 3\_source\_data\_24

A

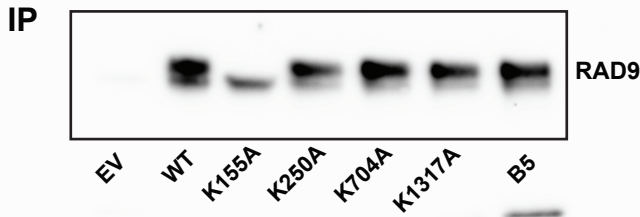

Supplement: fig2-figsupp3-data1 [file elife-90887-fig2-figsupp3-data1-v1.zip]

Figure 2-figure supplement 3\_source\_data\_26

A

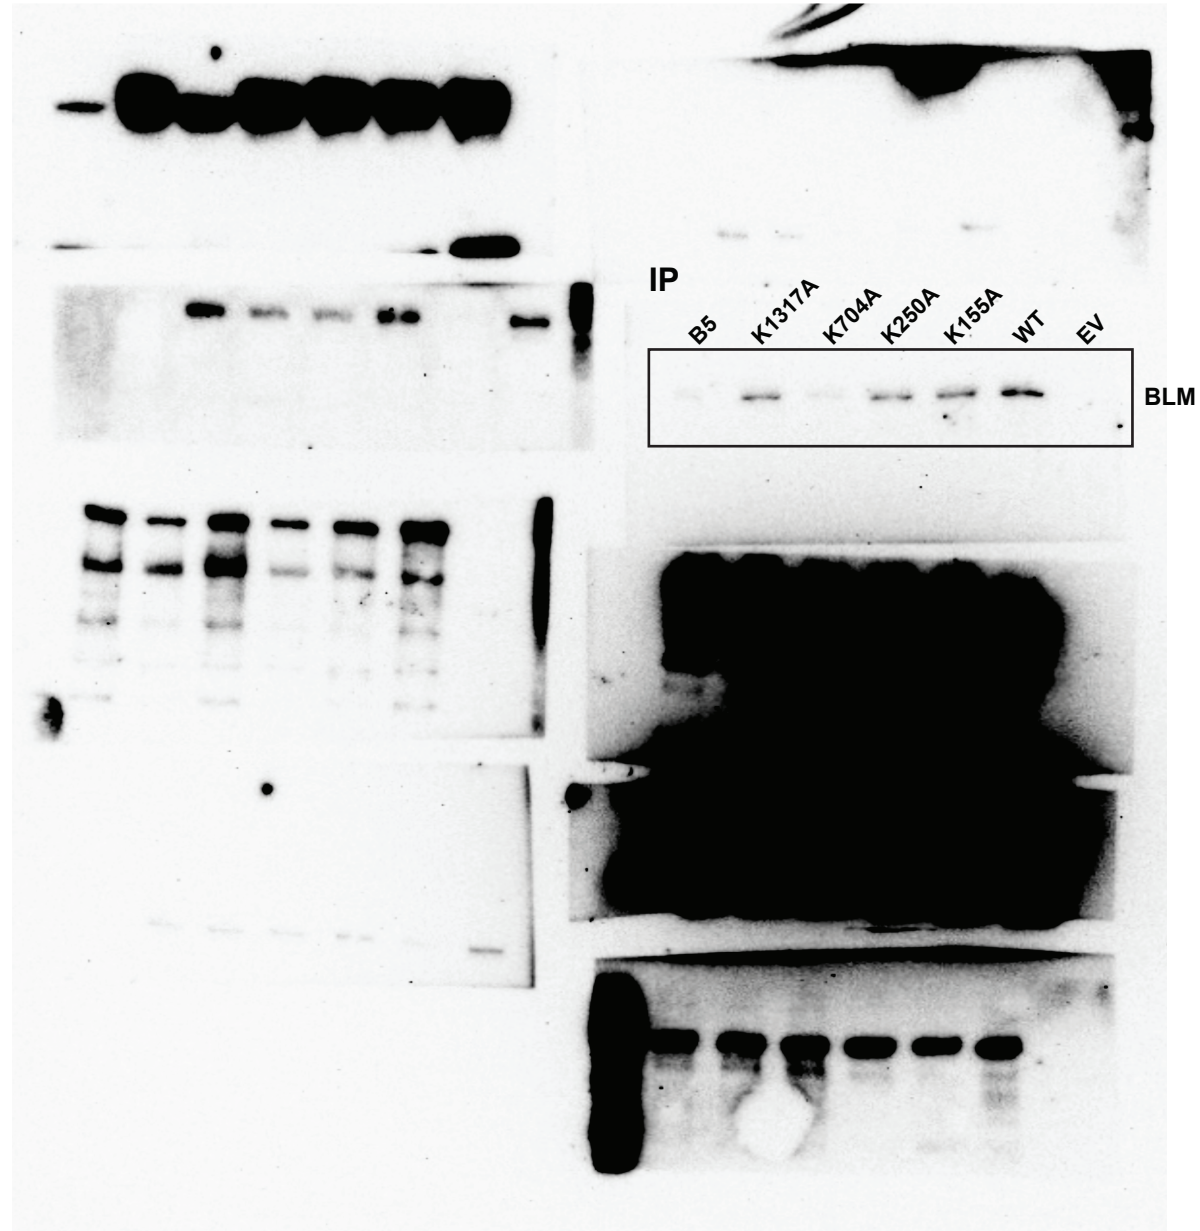

Supplement: fig2-figsupp3-data1 [file elife-90887-fig2-figsupp3-data1-v1.zip]

Figure 2-figure supplement 3\_source\_data\_30

A

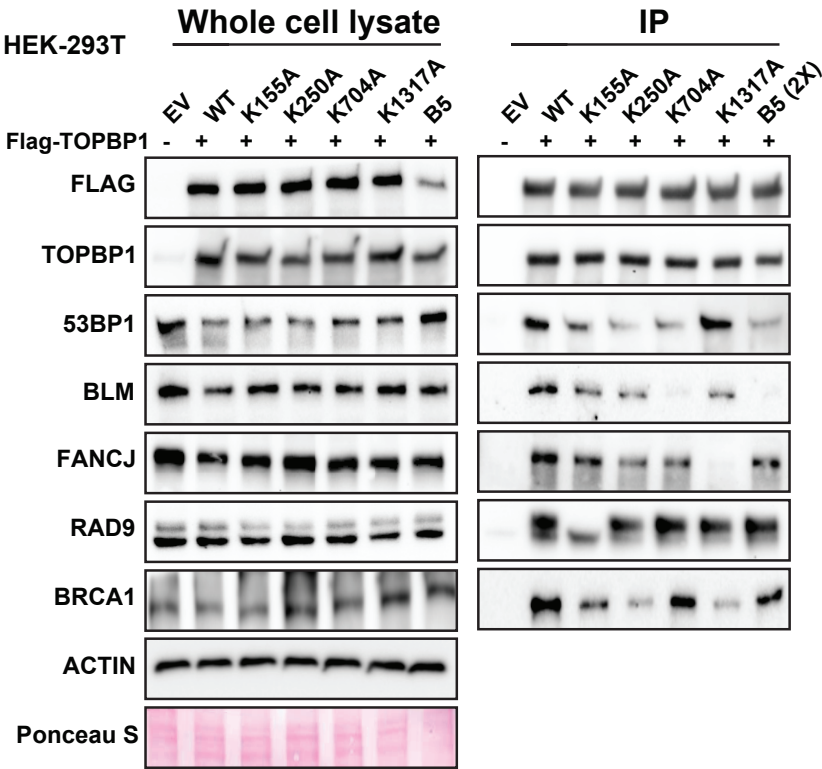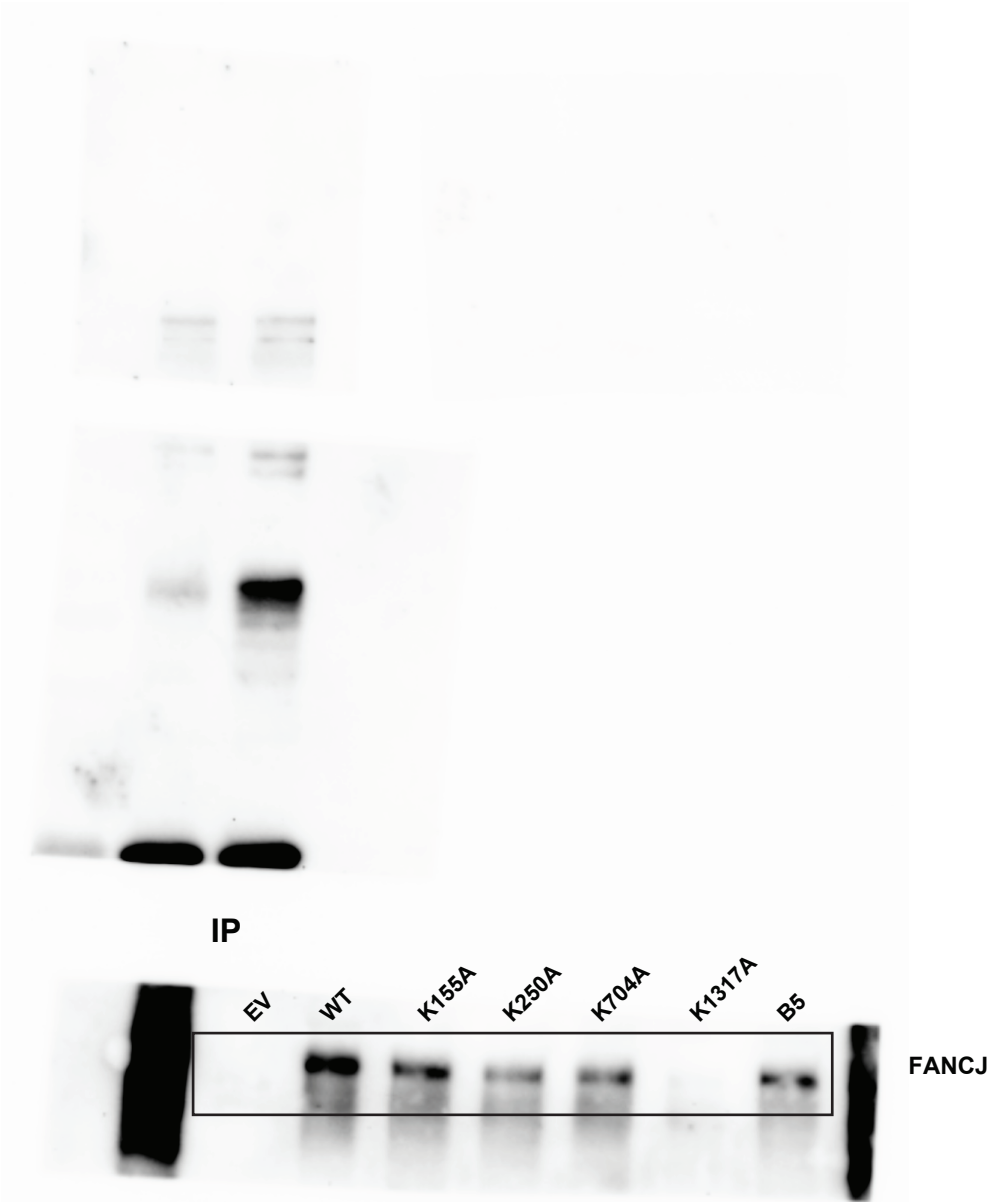

Supplement: fig2-figsupp3-data1 [file elife-90887-fig2-figsupp3-data1-v1.zip]

Figure 2-figure supplement 3\_source\_data\_14

A

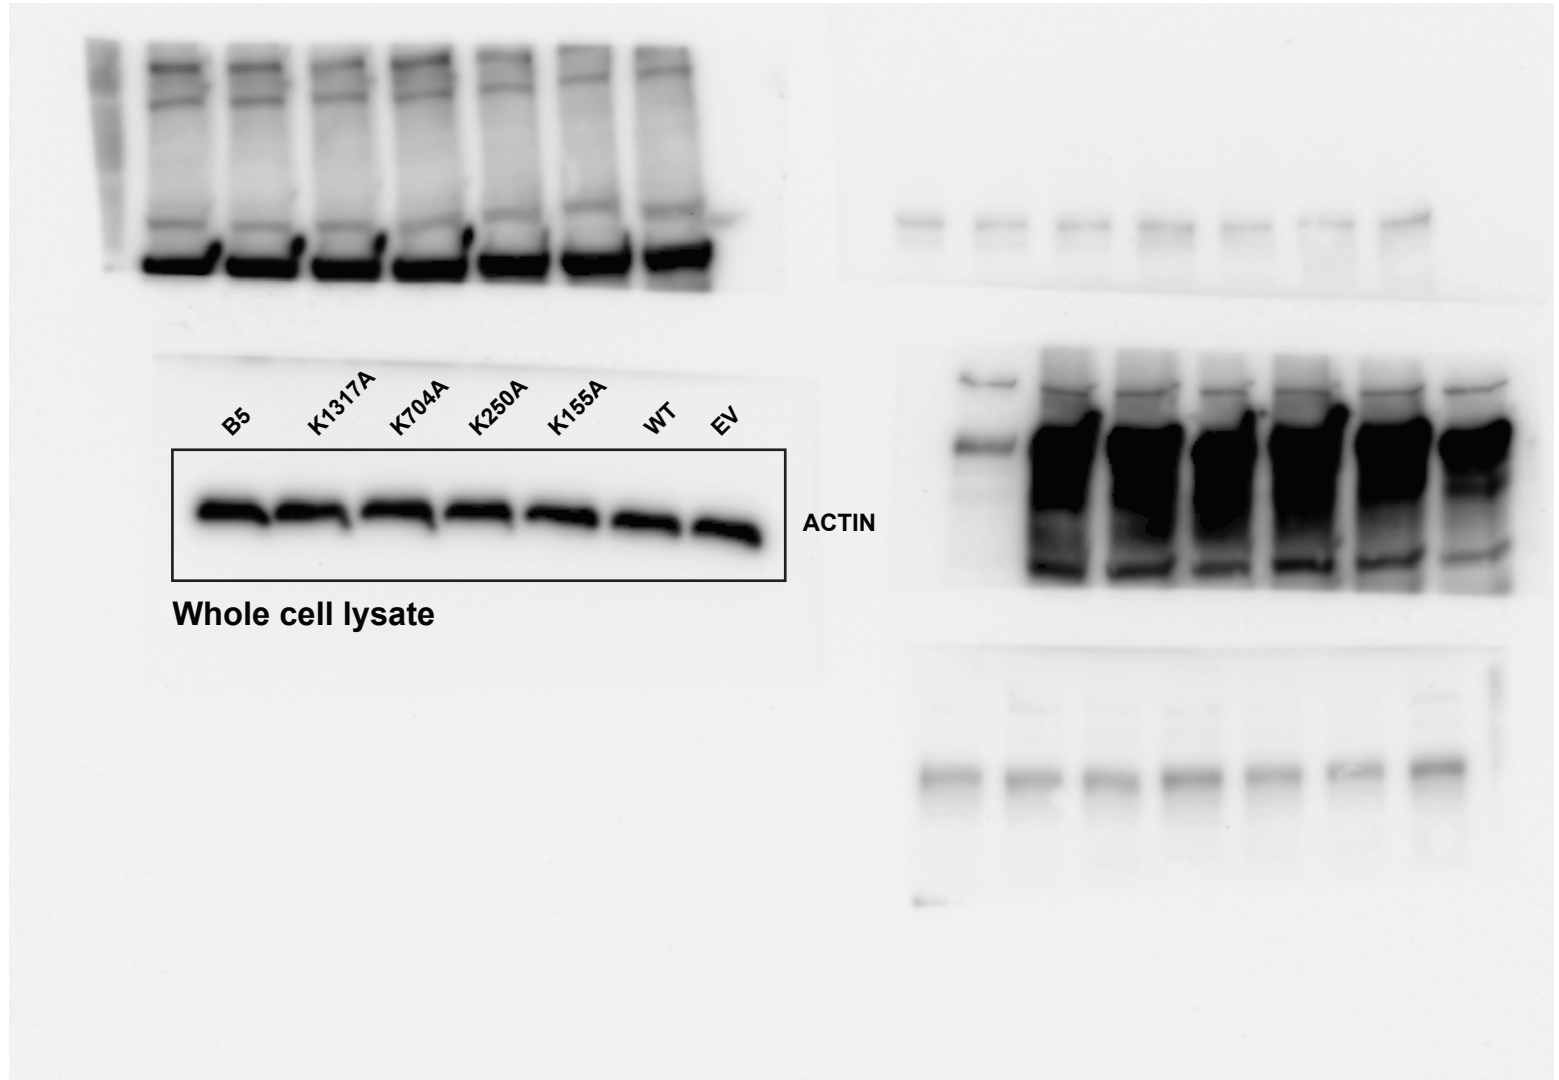

Supplement: fig2-figsupp3-data1 [file elife-90887-fig2-figsupp3-data1-v1.zip]

Figure 2-figure supplement 3\_source\_data\_22

A



IP

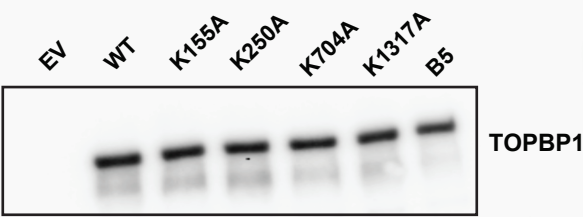

Supplement: fig2-figsupp3-data1 [file elife-90887-fig2-figsupp3-data1-v1.zip]
